# Supplementary material
Source: PubMed Central journal article supplement (PMC3512137)
Supplement: supp_112.144204_144204SI.pdf [file supp_112.144204_144204SI.pdf]

A

|   | A        | B |
|---|----------|---|
| 1 | C35E7.2  | 2 |
| 2 | Y8A9A.2  | 2 |
| 3 | Y16B4A.2 | 2 |

B

|   | A      | B        | C        | D         | E      | F           | G          | H       | I        | J        | K        | L         | M              | N             | O                        | P         | Q                     | R             | S                   | T         | U          | V        |
|---|--------|----------|----------|-----------|--------|-------------|------------|---------|----------|----------|----------|-----------|----------------|---------------|--------------------------|-----------|-----------------------|---------------|---------------------|-----------|------------|----------|
| 1 | Sample | # Chromo | Position | Reference | Change | Change_type | Homozygous | Quality | Coverage | Warnings | Gene_ID  | Gene_name | Bio_type       | Transcript_ID | Exon_ID                  | Exon_Rank | Effect                | old_AA/new_AA | Old_codon/New_codon | Codon_Num | Codon_Dege | CDS_size |
| 2 | mutA   | I        | 10841384 | G         | C      | SNP         | Hom        | 43.12   | 2        |          | C35E7.2  | C35E7.2   | protein_coding | C35E7.2a      | exon_I_10841103_10841965 | 1         | NON_SYNONYMOUS_CODING | R/T           | aGa/aCa             | 92        | 0          | 2124     |
| 3 | mutB   | I        | 10841434 | A         | C      | SNP         | Hom        | 80.72   | 3        |          | C35E7.2  | C35E7.2   | protein_coding | C35E7.2a      | exon_I_10841103_10841965 | 1         | NON_SYNONYMOUS_CODING | I/L           | Att/Ctt             | 109       | 0          | 2124     |
| 4 | mutB   | II       | 3796684  | C         | A      | SNP         | Hom        | 349.22  | 21       |          | Y8A9A.2  | Y8A9A.2   | protein_coding | Y8A9A.2       | exon_II_3796348_3797638  | 5         | NON_SYNONYMOUS_CODING | P/Q           | cCa/cAa             | 286       | 0          | 4083     |
| 5 | mutC   | II       | 3796759  | A         | T      | SNP         | Hom        | 1208.35 | 56       |          | Y8A9A.2  | Y8A9A.2   | protein_coding | Y8A9A.2       | exon_II_3796348_3797638  | 5         | NON_SYNONYMOUS_CODING | N/I           | aAt/aTt             | 311       | 0          | 4083     |
| 6 | mutA   | X        | 14766637 | G         | A      | SNP         | Hom        | 44.89   | 4        |          | Y16B4A.2 | Y16B4A.2  | protein_coding | Y16B4A.2      | exon_X_14766327_14766971 | 18        | NON_SYNONYMOUS_CODING | S/F           | tCc/tTc             | 1073      | 0          | 6504     |
| 7 | mutB   | X        | 14766625 | *         | -G     | DEL         | Hom        | 506.78  | 21       |          | Y16B4A.2 | Y16B4A.2  | protein_coding | Y16B4A.2      | exon_X_14766327_14766971 | 18        | FRAME_SHIFT: Y16B4A.2 |               |                     |           |            | 6504     |

**Figure S1** CloudMap *in silico* Complementation Test tool. **A:** Summary output. CloudMap allows for large scale *in silico* comparison of annotated WGS variants (that have been filtered for quality and had common variants subtracted) between many samples. The summary output from this comparison shows the number of alleles of each gene sorted from most to fewest. **B:** Comprehensive output. For each *in silico* Complementation Test summary output file, CloudMap provides the corresponding detailed list of snpEff-annotated, allelic gene hits that is also sorted from most to fewest alleles.

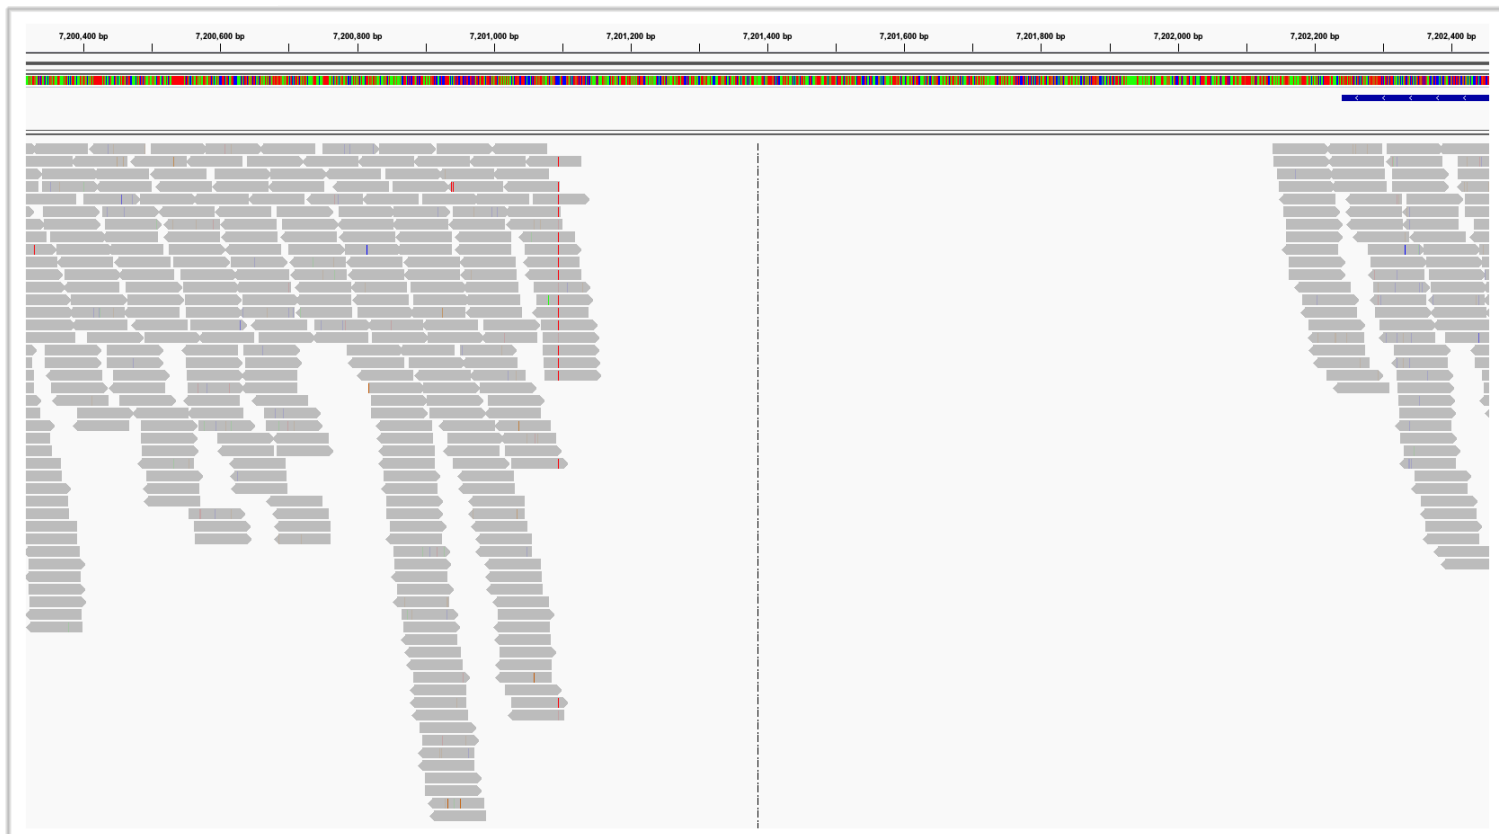

**Figure S2** Uncovered region confirmed to be a genomic deletion. CloudMap contains a workflow for annotating uncovered regions that may be genomic deletions. Users are encouraged to check if uncovered regions repeatedly appear in other strains and also to view these putative deletions in an alignment viewer. We find that true deletions tend to exhibit a cliff of high coverage followed by zero coverage on both uncovered boundary regions. Regions of high coverage flanking the putative deletion also often have SNPs or insertions present in many of the reads — indicating that distant genomic regions are now adjacent to one another. The deletion shown was confirmed to be a deletion via PCR and Sanger sequencing. The IGV viewer is used to display the alignment (Robinson et al., 2011, *Nature Biotechnology* 29, 24–26).

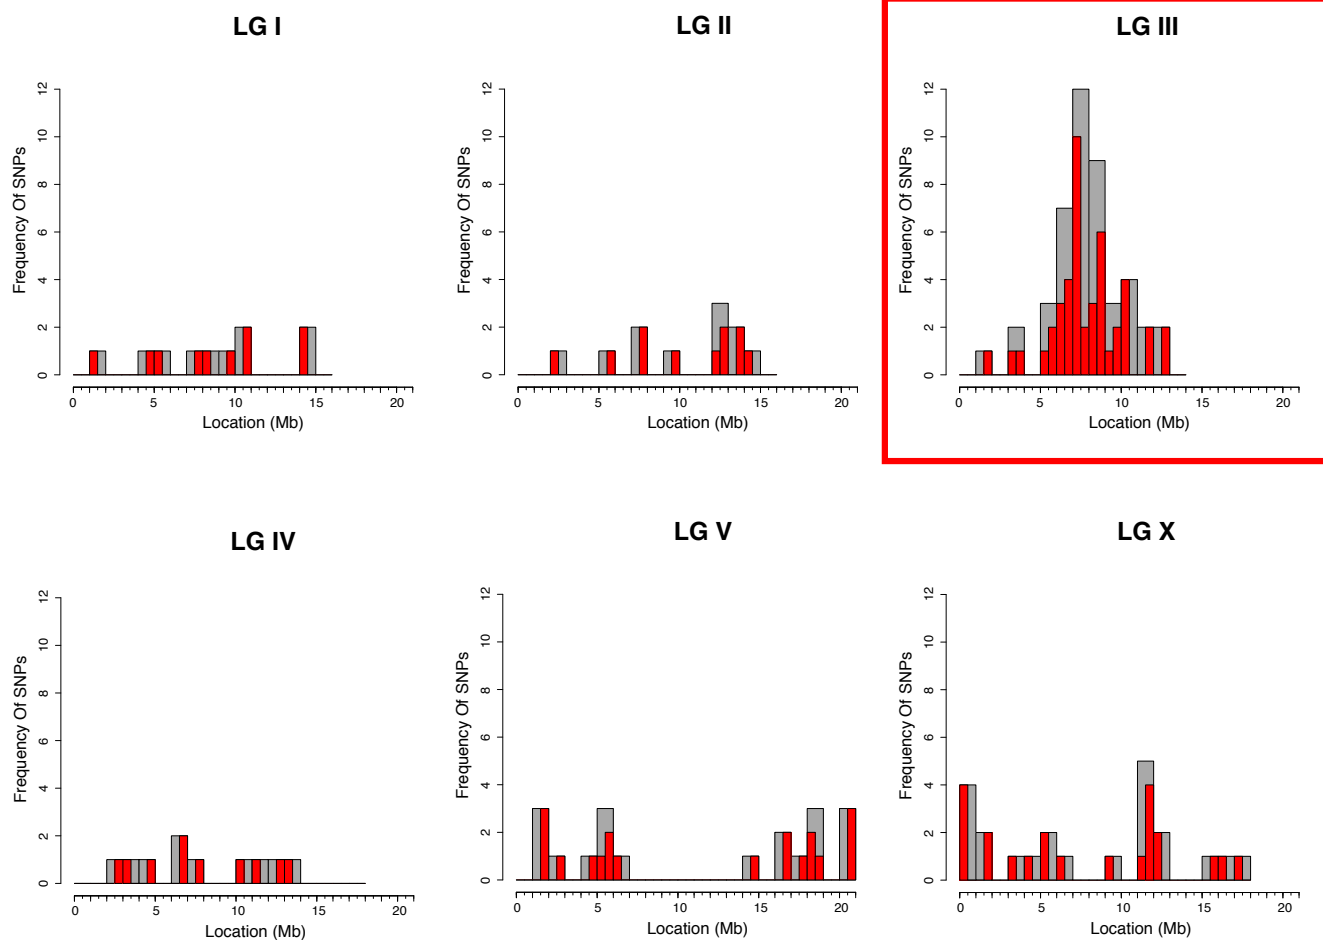

**Figure S3** *EMS Variant Density Mapping* tool: CloudMap also supports the approach detailed in Zuryn et al., that involves plotting frequencies of variant density in a mutant *C. elegans* strain that has been backcrossed to its (pre-mutagenesis) starting strain (ZURYN *et al.* 2010).

$$\text{Normalized frequency of pure parental alleles} = \frac{\left( \begin{array}{c} \# \text{ pure parental alleles at each mutant strain variant position} \\ \text{(per bin for pooled sequenced mutant)} \end{array} \right)^2}{\left( \begin{array}{c} \# \text{ heterozygous and} \\ \text{homozygous variants in} \\ \text{pooled mutant (per bin)} \end{array} - \begin{array}{c} \# \text{ pure parental alleles} \\ \text{at each mutant strain} \\ \text{variant position (per bin for} \\ \text{pooled sequenced mutant)} \end{array} \right)} \times \text{Average pure parental alleles at} \\
 \text{each mutant strain variant position} \\
 \text{(per bin, per chromosome, for} \\
 \text{pooled sequenced mutant)}$$

**Figure S4** *Variant Discovery Mapping* normalization equation. Pure parental alleles are defined as those positions in the pooled sequenced mutant where variant reads/total reads = 1 (after the appropriate variant subtraction strategy has been applied). Normalization is applied by default although users have the option of turning it off.

*Arabidopsis*: polymorphic mapping

*Arabidopsis*: variant discovery mapping

Unlinked chromosome

LG V

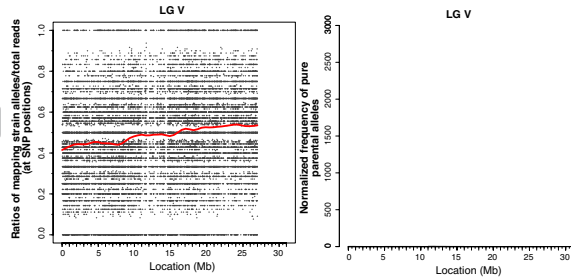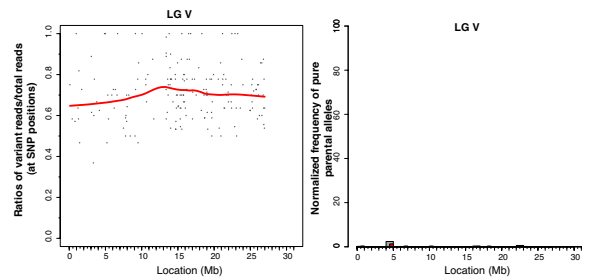

Linked chromosome

LG IV

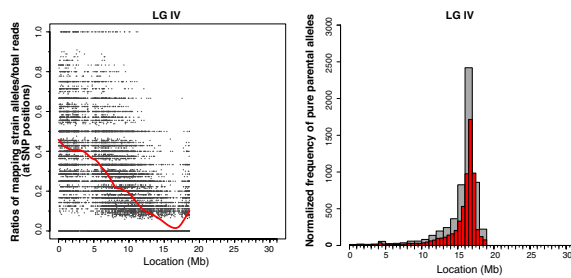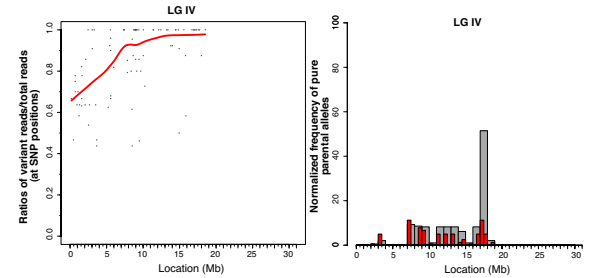

**Figure S5** Multi-organism *Variant Discovery Mapping* support. CloudMap natively supports the variant discovery mapping method for *Arabidopsis* as shown here for data from Schneeberger *et al.* 2009. Users must provide a simple configuration file for organisms other than *C. elegans* and *Arabidopsis*. Configuration files and instructions for other organism support are provided at <http://usegalaxy.org/cloudmap>

**Table S1 WS220 Hawaiian Variants filtered to assist in CloudMap *Hawaiian Variant Mapping with WGS Data* plot normalization.** This table provides details on the numbers of Hawaiian SNPs subtracted from mapping analysis for purposes of SNP mapping plot normalization. Details provided in text and in **Fig.7**.

| Mutant       | Trans-gene                      | Location of trans-gene (LG) | Location of Mutation (LG) | LG I | LG II | LG III | LG IV | LG V | LG X | < .05 or > .95 ratio positions | < .05 or > .95 ratio positions after transgene & mutation LGs removed |
|--------------|---------------------------------|-----------------------------|---------------------------|------|-------|--------|-------|------|------|--------------------------------|-----------------------------------------------------------------------|
| <i>ot219</i> | <i>otls114</i>                  | I                           | V                         | ✓    | ✓     | ✓      | ✓     |      | ✓    | 15,873                         | 4,003                                                                 |
| <i>ot266</i> | <i>vtls1</i>                    | V                           | X                         | ✓    | ✓     | ✓      | ✓     |      | ✓*   | 13,669                         | 11,033                                                                |
| <i>ot628</i> | <i>oxls12,</i><br><i>vsIs33</i> | V, X                        | I, V                      |      | ✓     | ✓      | ✓     |      |      | 22,268                         | 3,367                                                                 |
| <i>ot641</i> | <i>otls138,</i><br><i>vs33</i>  | V, X                        | X                         | ✓    | ✓     | ✓      | ✓     |      |      | 9,616                          | 4,314                                                                 |
| <i>ot642</i> | <i>otls138,</i><br><i>vs133</i> | V, X                        | X                         | ✓    | ✓     | ✓      | ✓     |      | ✓**  | 13,589                         | 5,021                                                                 |
| <i>ot704</i> | <i>otls341</i>                  | X                           | I                         |      | ✓     | ✓      | ✓     | ✓    |      | 14,805                         | 7,197                                                                 |
| <i>ot705</i> | <i>otls341</i>                  | X                           | III                       | ✓    | ✓     |        | ✓     | ✓    |      | 14,686                         | 7,969                                                                 |

✓ Considered SNPs on this chromosome for filtering

\* Excluding 6-13 Mb

\*\* Excluding 0-6 Mb

Total dataset used:

WS220\_WormMart HA SNPs: 112,061 Variants

<.05 or >.95 ratio positions in at least 2 samples: 8,715 Variants

<.05 & >.95 ratio positions in all 7 samples:1,563 Variants

Final curated Hawaiian SNP list (WS220.64): 103,346 Variants

**Table S2 CloudMap comparison with MAQGene.** This table shows variants in the mapping region of *ot266* as determined by CloudMap vs. MAQGene. CloudMap was able to identify a smaller mapping region than MAQGene (1Mb vs. 2.13Mb).

|                                                                   | <b>MAQGene</b>                             | <b>CloudMap</b>                             |
|-------------------------------------------------------------------|--------------------------------------------|---------------------------------------------|
| <b># of pooled recombinants</b>                                   | 50                                         | 50                                          |
| <b>Defined mapping interval</b>                                   | 8,841,415-10,975,250<br>(aligned to WS201) | 10,000,000-11,000,000<br>(aligned to WS220) |
| <b>Defined mapping region in Mb</b>                               | 2.13                                       | 1                                           |
| <b># Variants in the region<br/>(pre-variant subtraction)</b>     | 26                                         | 22                                          |
| <b># Variants in the region<br/>(post- variant subtraction)</b>   | not performed                              | 10                                          |
| <b># of protein coding variants in respective mapping regions</b> | 3                                          | 2                                           |
| <b>Premature stops</b>                                            | 1                                          | 1                                           |

### Additional Supporting Materials

Video user guides, automated workflows, and up to date CloudMap tools are available at: <http://usegalaxy.org/cloudmap>
