# Supplementary material
Source: PubMed Central journal article supplement (PMC3512137)
Supplement: supp_112.144204_FigureS1.pdf [file supp_112.144204_FigureS1.pdf]

A

|   | A        | B |
|---|----------|---|
| 1 | C35E7.2  | 2 |
| 2 | Y8A9A.2  | 2 |
| 3 | Y16B4A.2 | 2 |

B

|   | A      | B        | C        | D         | E      | F           | G          | H       | I        | J        | K        | L         | M              | N             | O                        | P         | Q                     | R             | S                   | T         | U          | V        |
|---|--------|----------|----------|-----------|--------|-------------|------------|---------|----------|----------|----------|-----------|----------------|---------------|--------------------------|-----------|-----------------------|---------------|---------------------|-----------|------------|----------|
| 1 | Sample | # Chromo | Position | Reference | Change | Change_type | Homozygous | Quality | Coverage | Warnings | Gene_ID  | Gene_name | Bio_type       | Transcript_ID | Exon_ID                  | Exon_Rank | Effect                | old_AA/new_AA | Old_codon/New_codon | Codon_Num | Codon_Dege | CDS_size |
| 2 | mutA   | I        | 10841384 | G         | C      | SNP         | Hom        | 43.12   | 2        |          | C35E7.2  | C35E7.2   | protein_coding | C35E7.2a      | exon_I_10841103_10841965 | 1         | NON_SYNONYMOUS_CODING | R/T           | aGa/aCa             | 92        | 0          | 2124     |
| 3 | mutB   | I        | 10841434 | A         | C      | SNP         | Hom        | 80.72   | 3        |          | C35E7.2  | C35E7.2   | protein_coding | C35E7.2a      | exon_I_10841103_10841965 | 1         | NON_SYNONYMOUS_CODING | I/L           | Att/Ctt             | 109       | 0          | 2124     |
| 4 | mutB   | II       | 3796684  | C         | A      | SNP         | Hom        | 349.22  | 21       |          | Y8A9A.2  | Y8A9A.2   | protein_coding | Y8A9A.2       | exon_II_3796348_3797638  | 5         | NON_SYNONYMOUS_CODING | P/Q           | cCa/cAa             | 286       | 0          | 4083     |
| 5 | mutC   | II       | 3796759  | A         | T      | SNP         | Hom        | 1208.35 | 56       |          | Y8A9A.2  | Y8A9A.2   | protein_coding | Y8A9A.2       | exon_II_3796348_3797638  | 5         | NON_SYNONYMOUS_CODING | N/I           | aAt/aTt             | 311       | 0          | 4083     |
| 6 | mutA   | X        | 14766637 | G         | A      | SNP         | Hom        | 44.89   | 4        |          | Y16B4A.2 | Y16B4A.2  | protein_coding | Y16B4A.2      | exon_X_14766327_14766971 | 18        | NON_SYNONYMOUS_CODING | S/F           | tCc/tTc             | 1073      | 0          | 6504     |
| 7 | mutB   | X        | 14766625 | *         | -G     | DEL         | Hom        | 506.78  | 21       |          | Y16B4A.2 | Y16B4A.2  | protein_coding | Y16B4A.2      | exon_X_14766327_14766971 | 18        | FRAME_SHIFT: Y16B4A.2 |               |                     |           |            | 6504     |

**Figure S1** CloudMap *in silico* Complementation Test tool. **A:** Summary output. CloudMap allows for large scale *in silico* comparison of annotated WGS variants (that have been filtered for quality and had common variants subtracted) between many samples. The summary output from this comparison shows the number of alleles of each gene sorted from most to fewest. **B:** Comprehensive output. For each *in silico* Complementation Test summary output file, CloudMap provides the corresponding detailed list of snpEff-annotated, allelic gene hits that is also sorted from most to fewest alleles.
