# Supplementary material
Source: PubMed Central journal article supplement (PMC3512137)
Supplement: supp_112.144204_FigureS3.pdf [file supp_112.144204_FigureS3.pdf]

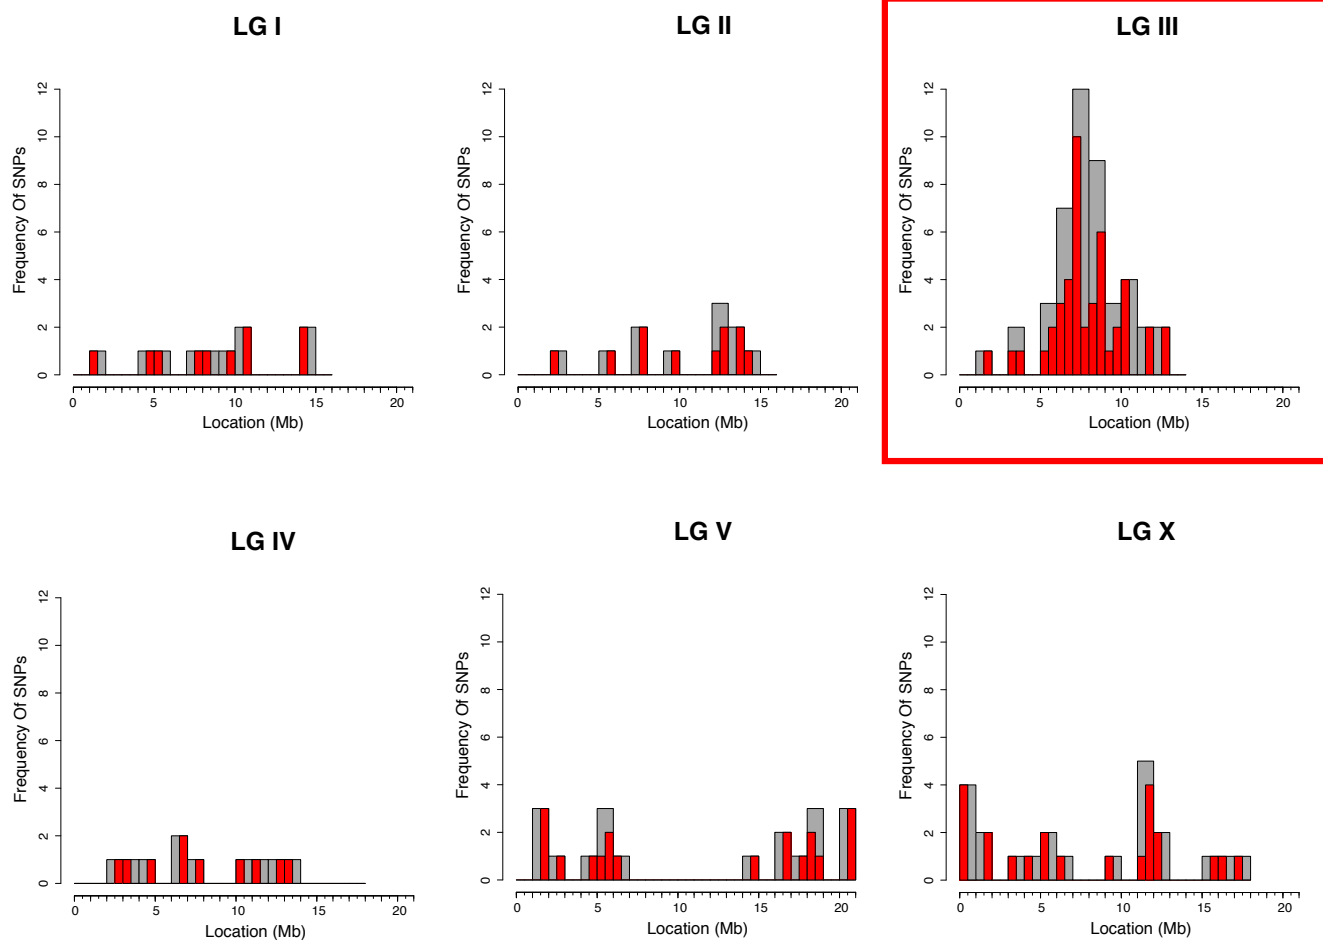

**Figure S3** *EMS Variant Density Mapping* tool: CloudMap also supports the approach detailed in Zuryn et al., that involves plotting frequencies of variant density in a mutant *C. elegans* strain that has been backcrossed to its (pre-mutagenesis) starting strain (ZURYN *et al.* 2010).
