# Supplementary material
Source: PubMed Central journal article supplement (PMC3512137)
Supplement: supp_112.144204_FigureS5.pdf [file supp_112.144204_FigureS5.pdf]

*Arabidopsis*: polymorphic mapping

*Arabidopsis*: variant discovery mapping

Unlinked chromosome

LG V

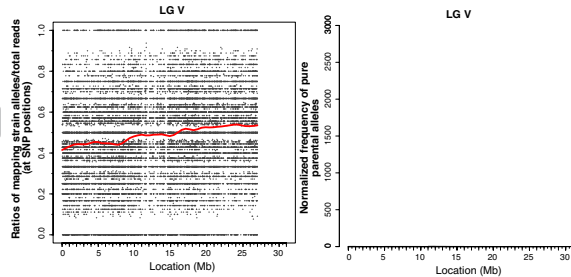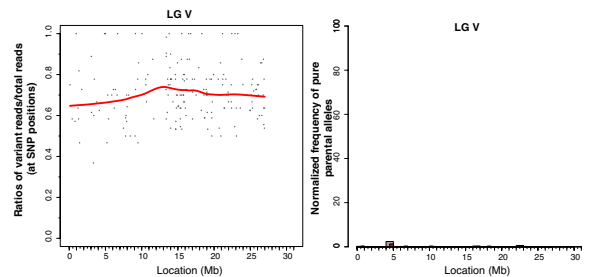

Linked chromosome

LG IV

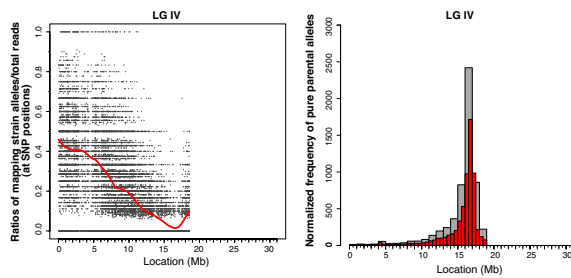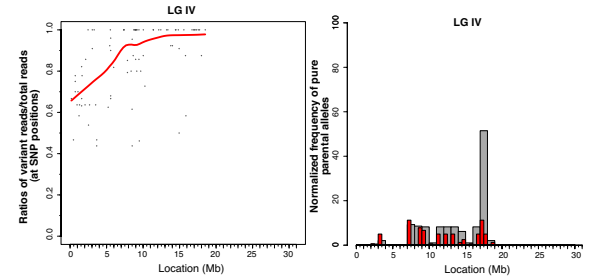

**Figure S5** Multi-organism *Variant Discovery Mapping* support. CloudMap natively supports the variant discovery mapping method for *Arabidopsis* as shown here for data from Schneeberger *et al.* 2009. Users must provide a simple configuration file for organisms other than *C. elegans* and *Arabidopsis*. Configuration files and instructions for other organism support are provided at <http://usegalaxy.org/cloudmap>
