# Supplementary material
Source: PubMed Central journal article supplement (PMC3512137)
Supplement: supp_112.144204_FileS1.pdf [file supp_112.144204_FileS1.pdf]

### Additional Supporting Materials

Video user guides, automated workflows, and up to date CloudMap tools are available at: <http://usegalaxy.org/cloudmap>
