# Supplementary material
Source: PubMed Central journal article supplement (PMC3512137)
Supplement: supp_112.144204_TableS1.pdf [file supp_112.144204_TableS1.pdf]

**Table S1 WS220 Hawaiian Variants filtered to assist in CloudMap *Hawaiian Variant Mapping with WGS Data* plot normalization.** This table provides details on the numbers of Hawaiian SNPs subtracted from mapping analysis for purposes of SNP mapping plot normalization. Details provided in text and in **Fig.7**.

| Mutant       | Trans-gene                      | Location of trans-gene (LG) | Location of Mutation (LG) | LG I | LG II | LG III | LG IV | LG V | LG X | < .05 or > .95 ratio positions | < .05 or > .95 ratio positions after transgene & mutation LGs removed |
|--------------|---------------------------------|-----------------------------|---------------------------|------|-------|--------|-------|------|------|--------------------------------|-----------------------------------------------------------------------|
| <i>ot219</i> | <i>otls114</i>                  | I                           | V                         | ✓    | ✓     | ✓      | ✓     |      | ✓    | 15,873                         | 4,003                                                                 |
| <i>ot266</i> | <i>vtls1</i>                    | V                           | X                         | ✓    | ✓     | ✓      | ✓     |      | ✓*   | 13,669                         | 11,033                                                                |
| <i>ot628</i> | <i>oxls12,</i><br><i>vsIs33</i> | V, X                        | I, V                      | ✓    | ✓     | ✓      | ✓     |      |      | 22,268                         | 3,367                                                                 |
| <i>ot641</i> | <i>otls138,</i><br><i>vs33</i>  | V, X                        | X                         | ✓    | ✓     | ✓      | ✓     |      |      | 9,616                          | 4,314                                                                 |
| <i>ot642</i> | <i>otls138,</i><br><i>vs133</i> | V, X                        | X                         | ✓    | ✓     | ✓      | ✓     |      | ✓**  | 13,589                         | 5,021                                                                 |
| <i>ot704</i> | <i>otls341</i>                  | X                           | I                         |      | ✓     | ✓      | ✓     | ✓    |      | 14,805                         | 7,197                                                                 |
| <i>ot705</i> | <i>otls341</i>                  | X                           | III                       | ✓    | ✓     |        | ✓     | ✓    |      | 14,686                         | 7,969                                                                 |

✓ Considered SNPs on this chromosome for filtering

\* Excluding 6-13 Mb

\*\* Excluding 0-6 Mb

Total dataset used:

WS220\_WormMart HA SNPs: 112,061 Variants

<.05 or >.95 ratio positions in at least 2 samples: 8,715 Variants

<.05 & >.95 ratio positions in all 7 samples:1,563 Variants

Final curated Hawaiian SNP list (WS220.64): 103,346 Variants
