# Supplementary material
Source: PubMed Central journal article supplement (PMC3512137)
Supplement: supp_112.144204_TableS2.pdf [file supp_112.144204_TableS2.pdf]

**Table S2 CloudMap comparison with MAQGene.** This table shows variants in the mapping region of *ot266* as determined by CloudMap vs. MAQGene. CloudMap was able to identify a smaller mapping region than MAQGene (1Mb vs. 2.13Mb).

|                                                                   | <b>MAQGene</b>                             | <b>CloudMap</b>                             |
|-------------------------------------------------------------------|--------------------------------------------|---------------------------------------------|
| <b># of pooled recombinants</b>                                   | 50                                         | 50                                          |
| <b>Defined mapping interval</b>                                   | 8,841,415-10,975,250<br>(aligned to WS201) | 10,000,000-11,000,000<br>(aligned to WS220) |
| <b>Defined mapping region in Mb</b>                               | 2.13                                       | 1                                           |
| <b># Variants in the region<br/>(pre-variant subtraction)</b>     | 26                                         | 22                                          |
| <b># Variants in the region<br/>(post- variant subtraction)</b>   | not performed                              | 10                                          |
| <b># of protein coding variants in respective mapping regions</b> | 3                                          | 2                                           |
| <b>Premature stops</b>                                            | 1                                          | 1                                           |
